# Supplementary material for: Fabrication of Textile Waste Fibers Aerogels with Excellent Oil/Organic Solvent Adsorption and Thermal Properties
Source: MDPI journal article supplement (doi:10.3390/gels8100684), 2022-10-21
Supplement: s1 [file s1]

# Fabrication of Textile Waste Fibers Aerogels with Excellent Oil/Organic Solvent Adsorption and Thermal Properties

Chunlei Dong<sup>1</sup>, Yangzhao Hu<sup>1</sup>, Yuxuan Zhu<sup>1</sup>, Jiale Wang<sup>1</sup>, Xuerui Jia<sup>1</sup>, Jianbing Chen<sup>1,2,\*</sup>, Jingliang Li<sup>2,\*</sup>

**Table S1** Thermal stability of aerogels

| Sample Name      | 125 °C weight loss (%) | T <sub>5</sub> % <sup>1</sup> (°C) | T <sub>10</sub> % <sup>2</sup> (°C) |
|------------------|------------------------|------------------------------------|-------------------------------------|
| Uncoated aerogel | 4.5                    | 233.6                              | 270.2                               |
| TW01             | 0.8                    | 263.2                              | 279.1                               |
| TW02             | 1.1                    | 255.9                              | 288.9                               |
| TW03             | 0.4                    | 270.3                              | 292.8                               |

<sup>1</sup> The temperature of weight loss 5%.

<sup>2</sup> The temperature of weight loss 10%.

**Table S2.** The mechanical property of the TWF aerogels.

| Sample Name | Young's modulus (kPa) | Strain 10% (kPa) | Strain 50% (kPa) |
|-------------|-----------------------|------------------|------------------|
| TW01        | 1.30 ± 0.16           | 19.9             | 60.1             |
| TW02        | 2.97 ± 0.21           | 42.1             | 128.6            |
| TW03        | 4.34 ± 0.19           | 54.0             | 199.6            |
| TW04        | 5.24 ± 0.22           | 67.1             | 235.1            |

**Table S3.** The motor oil absorption capabilities of TWF aerogels.

| Sample Name | Oil absorption capacity (g/g) |            |            |            |
|-------------|-------------------------------|------------|------------|------------|
|             | 5W-30                         |            | 5W-40      |            |
|             | 25 °C                         | 75 °C      | 25 °C      | 75 °C      |
| TW01        | 18.6 ± 1.2                    | 15.3 ± 0.3 | 16.0 ± 1.5 | 15.5 ± 0.3 |
| TW02        | 14.1 ± 0.5                    | 13.7 ± 0.3 | 13.5 ± 0.5 | 13.3 ± 0.3 |
| TW03        | 11.6 ± 0.5                    | 10.2 ± 0.3 | 10.6 ± 0.4 | 10.1 ± 0.2 |
| TW04        | 9.4 ± 0.2                     | 8.3 ± 0.1  | 8.7 ± 0.3  | 8.4 ± 0.1  |

**Table S4.** Specification of motor oil.

| Motor Oil | Viscosity (mPa·s) |       |       |
|-----------|-------------------|-------|-------|
|           | 25 °C             | 50 °C | 75 °C |
| 5W-30     | 96.6              | 50.4  | 21.0  |
| 5W-40     | 117.8             | 55.6  | 29.6  |

**Table S5.** Effect of cycles of sorption on oil absorption capacity and squeezed ratio of absorbed oil.

| cycles | Oil absorption capacity(g/g) | Squeezed ratio of absorbed oil (%) |
|--------|------------------------------|------------------------------------|
| 1      | 18.6 ± 1.2                   | 79.9 ± 3.0                         |
| 2      | 3.2 ± 0.3                    | 97.3 ± 1.3                         |
| 3      | 2.8 ± 0.2                    | 98.5 ± 1.0                         |
| 4      | 2.7 ± 0.2                    | 99.3 ± 0.4                         |

**Citation:** Dong, C.; Hu, Y.; Zhu, Y.; Wang, J.; Jia, X.; Chen, J.; Li, J. Fabrication of Textile Waste Fibers Aerogels with Excellent Oil/Organic Solvent Adsorption and Thermal Properties. *Gels* **2022**, *8*, 684. <https://doi.org/10.3390/gels8100684>

Academic Editor: Miguel Sanchez-Soto

Received: 8 October 2022

Accepted: 19 October 2022

Published: 21 October 2022

**Publisher's Note:** MDPI stays neutral with regard to jurisdictional claims in published maps and institutional affiliations.

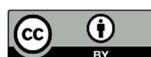

**Copyright:** © 2022 by the authors. Licensee MDPI, Basel, Switzerland. This article is an open access article distributed under the terms and conditions of the Creative Commons Attribution (CC BY) license (<https://creativecommons.org/licenses/by/4.0/>).

|   |               |                |
|---|---------------|----------------|
| 5 | $2.8 \pm 0.2$ | $99.4 \pm 0.3$ |
|---|---------------|----------------|

**Table S6.** Absorption capacity of TW01 for various solvents

| Organic Solvent       | Density ( $\text{g}/\text{cm}^3$ ) | Absorption capacity( $\text{g}/\text{g}$ ) |
|-----------------------|------------------------------------|--------------------------------------------|
| Chloroform            | 1.490                              | $26.9 \pm 0.6$                             |
| N,N-Dimethylformamide | 0.944                              | $18.6 \pm 0.3$                             |
| Methyl methacrylate   | 0.943                              | $18.3 \pm 0.5$                             |
| Methylbenzen          | 0.872                              | $17.3 \pm 0.7$                             |
| Ethanol               | 0.789                              | $16.2 \pm 0.5$                             |
| Diethyl ether         | 0.713                              | $14.2 \pm 0.3$                             |

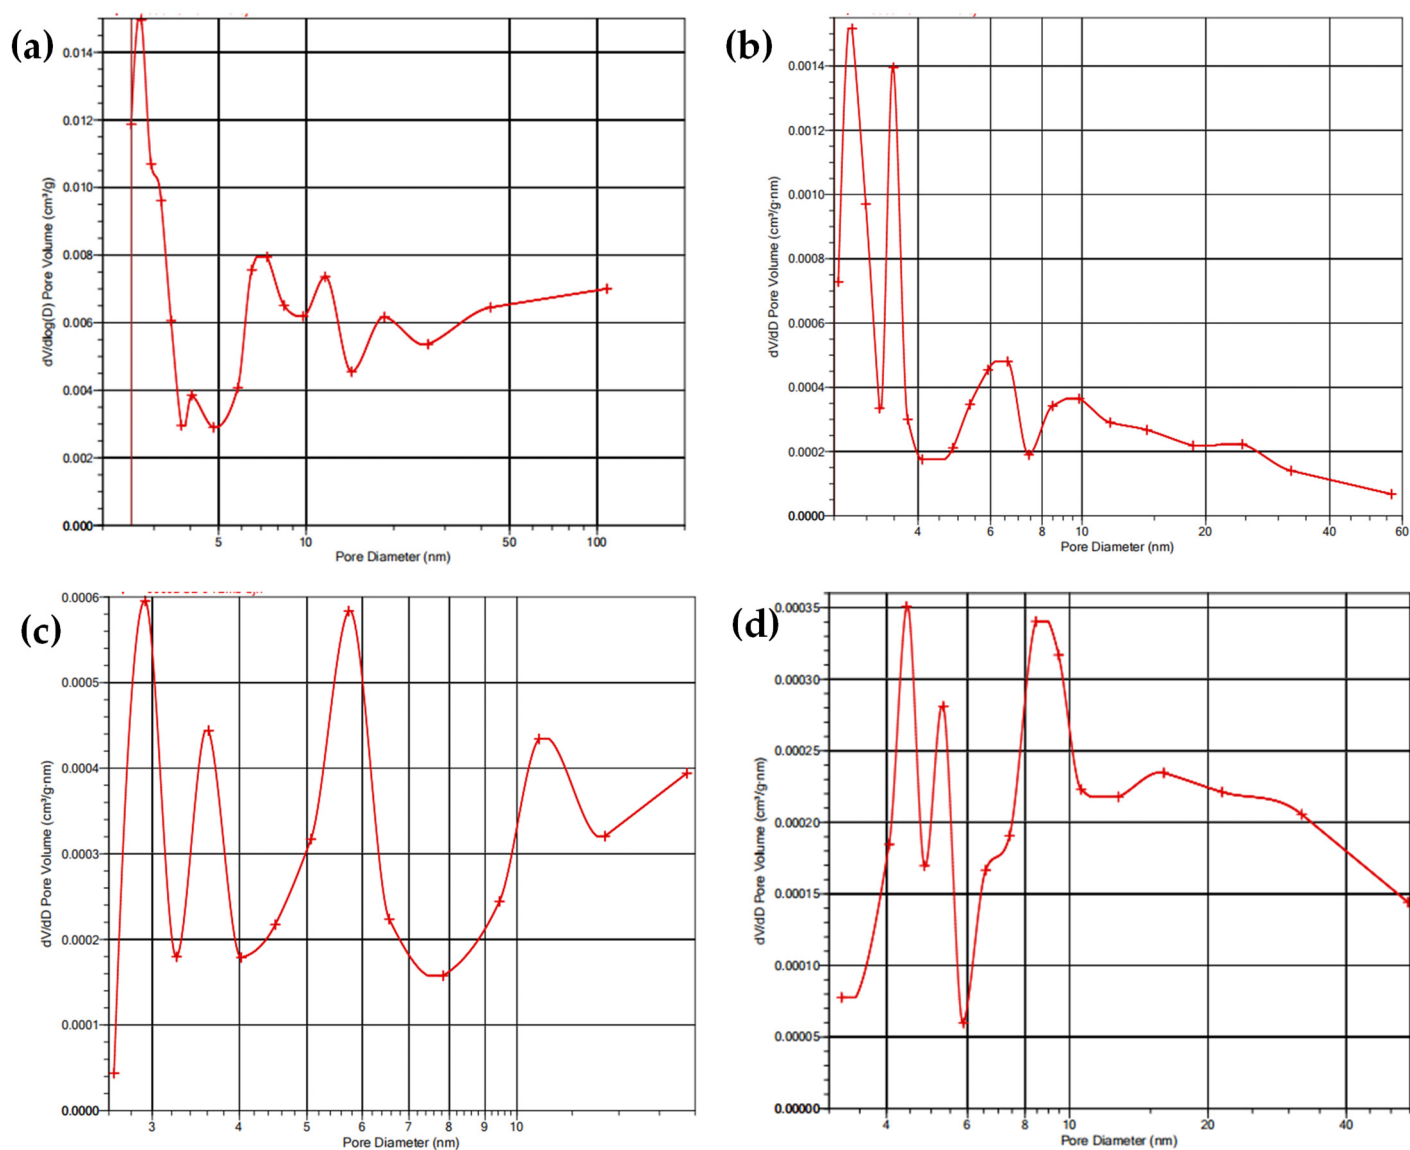**Figure S1.** Pore size distribution: a) TW01, b) TW02, c) TW03 and d) TW04.
